# Supplementary material for: Antimonene nanosheets with enhanced electrochemical performance for energy storage applications
Source: Royal Society of Chemistry journal article supplement (doi:10.1039/d0dt01753a), 2020-01-01
Supplement: d0dt01753a1.pdf [file d0dt01753a1.pdf]

## Antimonene nanosheets for energy storage application with enhanced supercapacitor electrochemical performance

M.Mohamed Ismail<sup>1</sup>, J.Vigneshwaran<sup>2</sup>, S.Arun Balaji<sup>1</sup>, D.Mani<sup>1</sup>, M.Arivanandhan<sup>1\*</sup>, Sujin P Jose<sup>2</sup>, R.Jayavel<sup>1</sup>

<sup>1</sup>Centre for Nanoscience and Technology, Anna University, Chennai-600025, India.

<sup>2</sup>School of Physics, Madurai Kamaraj University, Madurai 625021, India.

### Supplementary Information

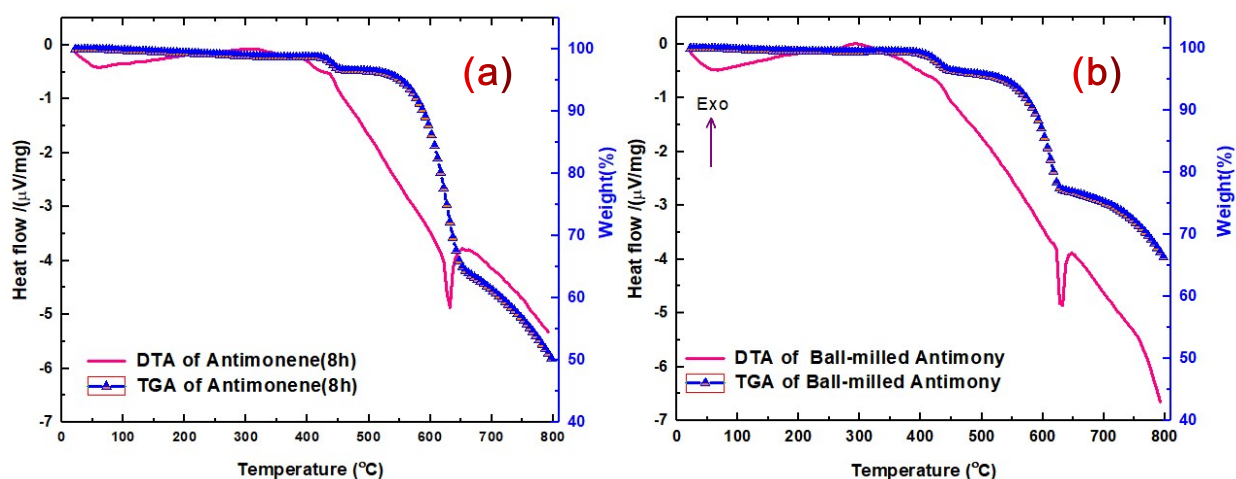

**S1: Differential thermal analysis and Thermogravimetric analysis of antimonene (8h) (a) and ball-milled antimony (b)**

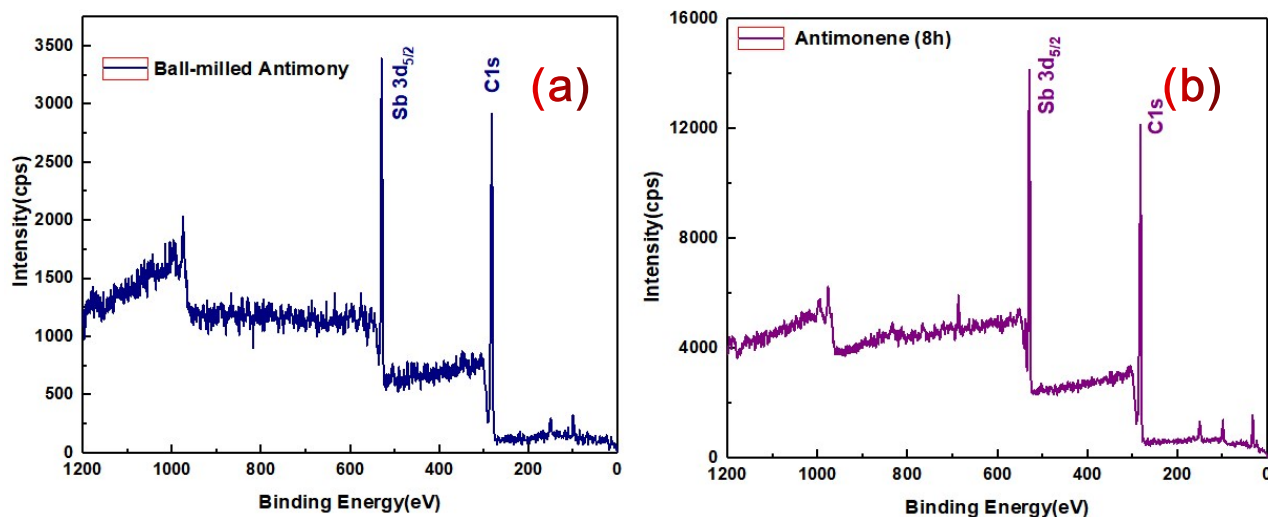

**S2: XPS survey spectrum of ballmilled antimony (a) and antimonene(8h) (b)**

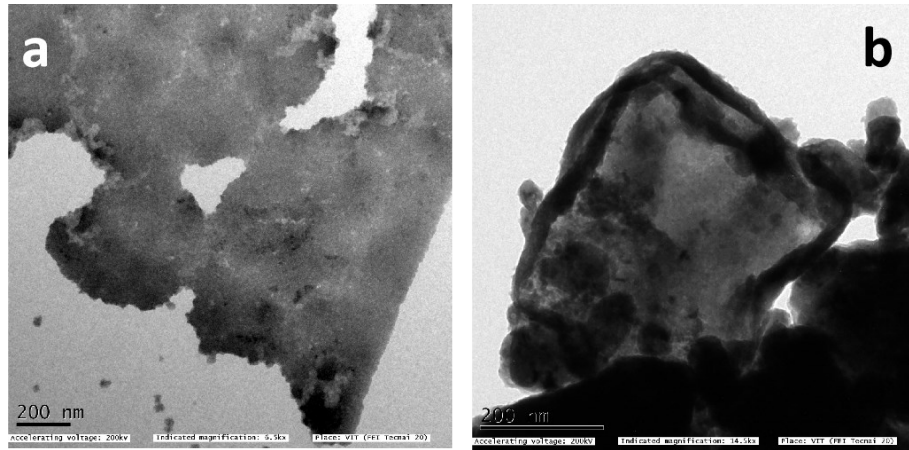

**S3: TEM images of Antimonene**

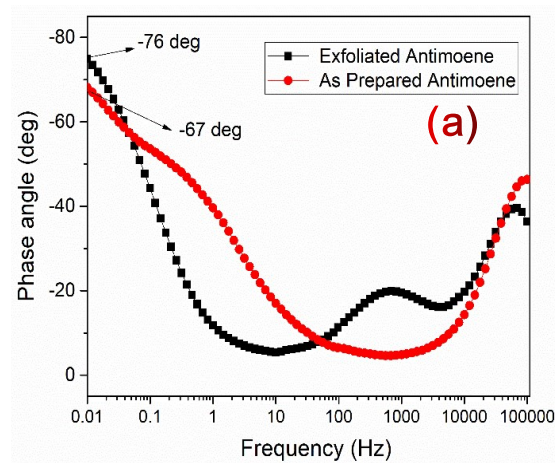

**S4: Phase angle of ball-milled antimony and antimonene(8h)**
